# Supplementary material for: Geometries of hydrogen bonds in water–ethanol mixtures from ab initio molecular dynamics simulations
Source: Royal Society of Chemistry journal article supplement (doi:10.1039/d2cp01238c), 2022-01-01
Supplement: d2cp01238c1.pdf [file d2cp01238c1.pdf]

## Electronic Supplementary Information

### Contents

**S1:** Dimension of the simulation cell for for water-ethanol mixtures at different compositions

**S2:** Comparison of structure factor calculated from AIMD simulations with the experimental neutron/X ray data. Scatter plot of the non-bonded  $r_{OH\cdots O}$  and  $r_{O\cdots O}$  distances and  $\angle HO\cdots O$  angle ( $\theta$ ) for different donor-acceptor H-bonded pairs in water-ethanol mixtures with composition  $x_{EtOH}=0.2$ . (Figure S1),  $x_{EtOH}=0.6$  (Figure S2), and  $x_{EtOH}=0.8$  (Figure S3)

**S3.** The distribution of non-bonded parameters,  $r_{O\cdots O}$  (Å) and  $\theta^\circ(\angle HO\cdots O)$ , for the data in the scatter plots of Figures 1d-f. ( Figure S4)

**S4:** The geometrical cut-off and centroid value hydrogen bonding parameters for water-ethanol mixtures at different compositions (Table S2).

**S5:** Comparison of the average number of hydrogen bonded neighbours,  $\langle n_{HB} \rangle$ , at different compositions of the water-ethanol mixture, using the geometrical cut-off hydrogen bonding parameters in Table S2 with those calculated using the empirical geometrical cut-off values ,  $r_{O-O} < 3.5 \text{ \AA}$  and angle  $\angle HO\cdots O < 30^\circ$  from Reference 27. ( Figure S5 and Table S3).

**Table S1:** Dimension of the simulation cell for for water-ethanol mixtures at different compositions

| <i>Mole Fraction, <math>x_{EtOH}</math></i> | <b>Length of the simulation box (Å)</b> |
|---------------------------------------------|-----------------------------------------|
| <b>0.1</b>                                  | 15.42                                   |
| <b>0.2</b>                                  | 16.31                                   |
| <b>0.3</b>                                  | 17.11                                   |
| <b>0.4</b>                                  | 17.84                                   |
| <b>0.5</b>                                  | 18.51                                   |
| <b>0.6</b>                                  | 19.14                                   |
| <b>0.7</b>                                  | 19.74                                   |
| <b>0.8</b>                                  | 20.29                                   |
| <b>0.9</b>                                  | 20.82                                   |
| <b>1</b>                                    | 21.32                                   |

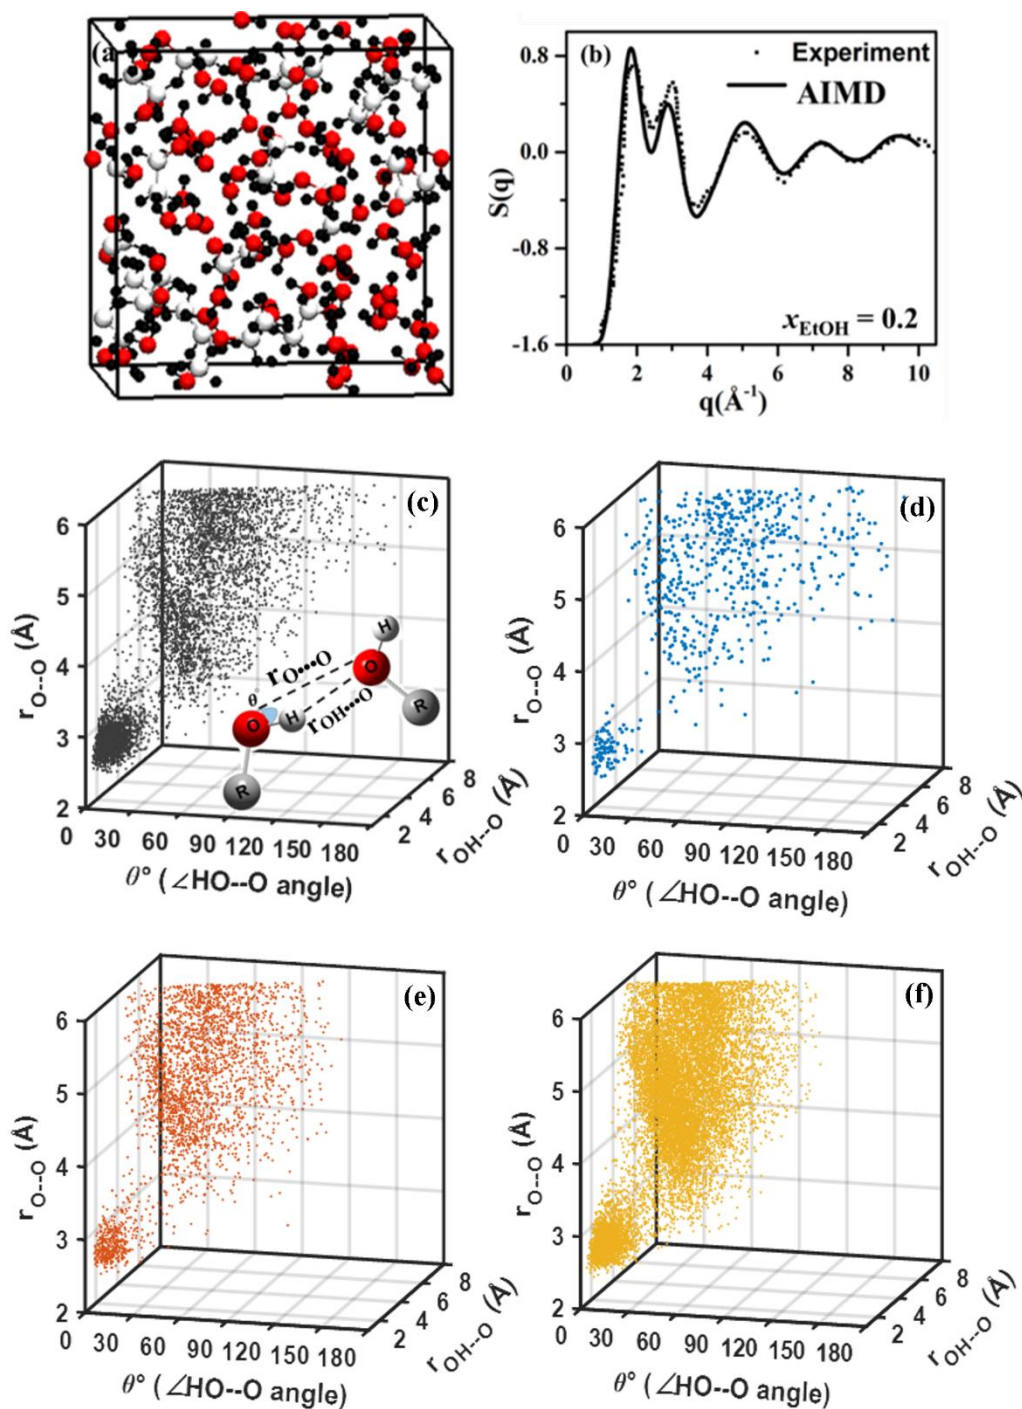

**Figure S1:** a) Snapshot of the post-equilibration simulation cell for an ethanol-water mixture,  $x_{\text{EtOH}} = 0.2$  b) Comparison of the structure factor obtained from AIMD simulations with the X-ray scattering data for the  $x_{\text{EtOH}} = 0.2$  water-ethanol mixture from Ref. 37. Scatter plot of the non-bonded  $r_{\text{OH}\cdots\text{O}}$  and  $r_{\text{O}\cdots\text{O}}$  distances and  $\angle\text{HO}\cdots\text{O}$  angle ( $\theta$ ) for c) all possible pair of molecules in the ensemble, d) all EtOH-EtOH pairs, e) all EtOH-H<sub>2</sub>O pairs of molecules and f) all H<sub>2</sub>O-H<sub>2</sub>O pairs, for a water-ethanol mixture with composition  $x_{\text{EtOH}} = 0.2$ .

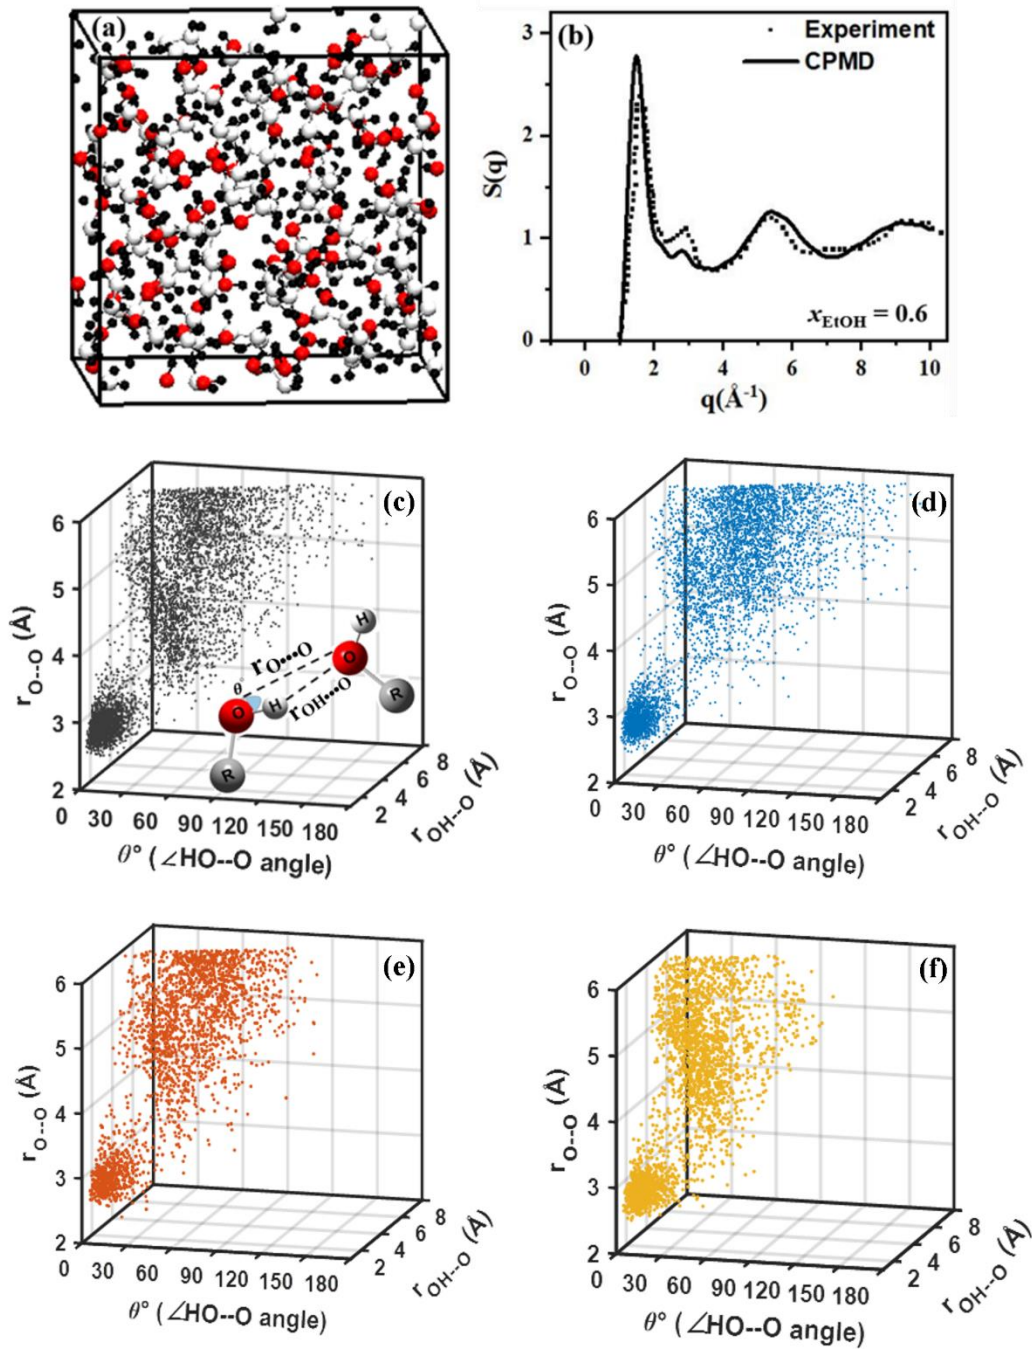

**Figure S2:** a) Snapshot of the post-equilibration simulation cell for an ethanol-water mixture,  $x_{EtOH} = 0.6$  b) Comparison of the structure factor obtained from AIMD simulations with the X-ray scattering data for the  $x_{EtOH} = 0.6$  water-ethanol mixture from Ref. 37. Scatter plot of the non-bonded  $r_{OH...O}$  and  $r_{O...O}$  distances and  $\angle HO-O$  angle ( $\theta$ ) for c) all possible pair of molecules in the ensemble, d) all EtOH-EtOH pairs, e) all EtOH-H<sub>2</sub>O pairs of molecules and f) all H<sub>2</sub>O-H<sub>2</sub>O pairs for a water-ethanol mixture with composition  $x_{EtOH} = 0.6$ .

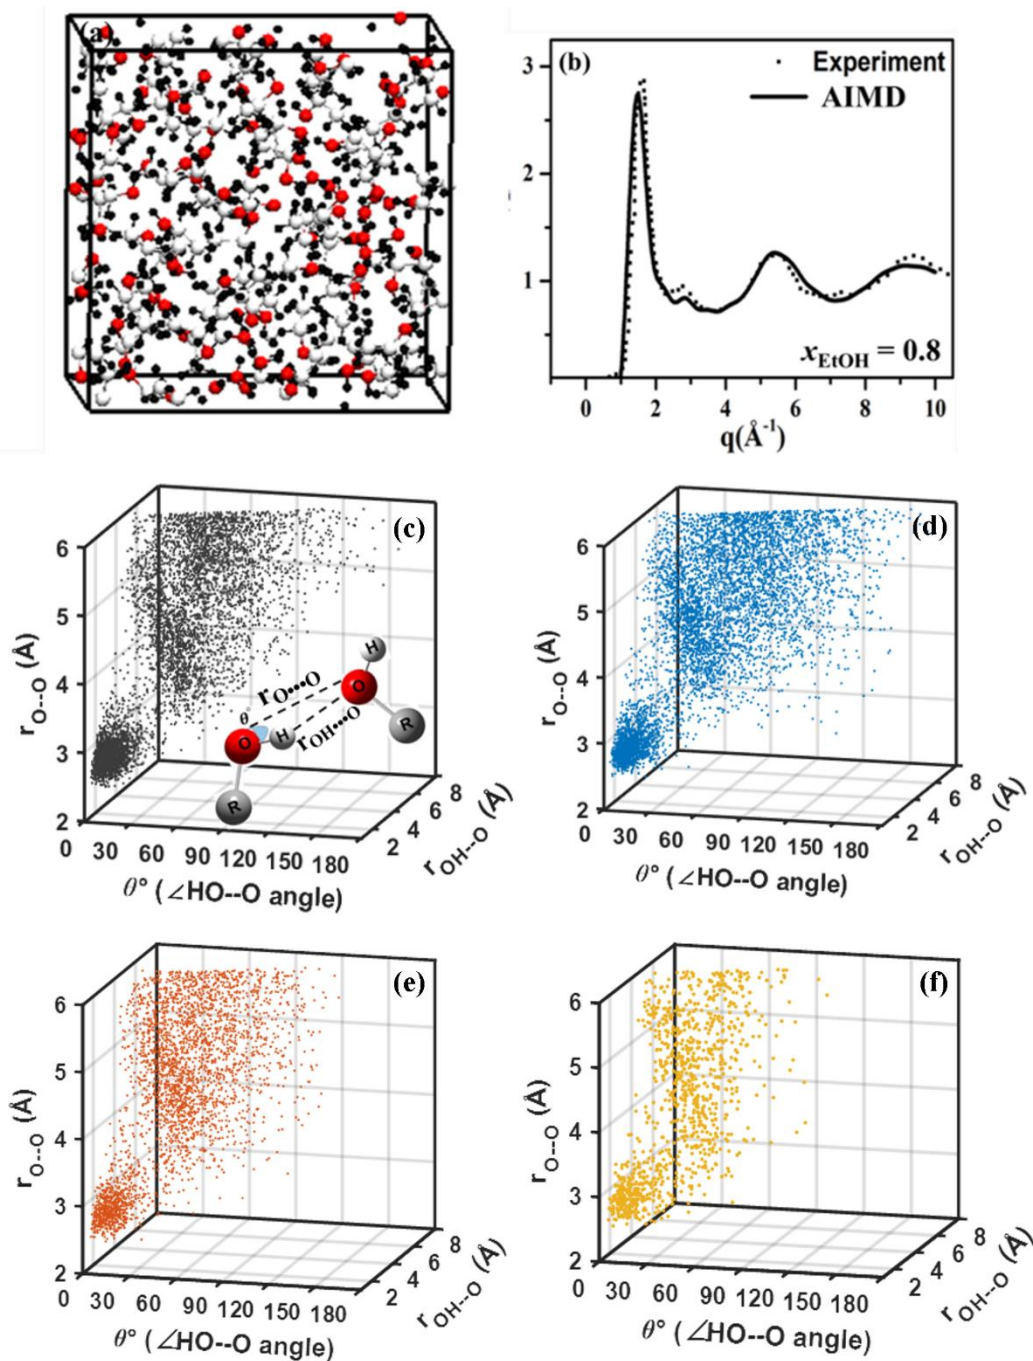

**Figure S2:** a) Snapshot of the post-equilibration simulation cell for an ethanol-water mixture,  $x_{\text{EtOH}} = 0.8$  b) Comparison of the structure factor obtained from AIMD simulations with the X-ray scattering data for the  $x_{\text{EtOH}} = 0.8$  water-ethanol mixture from Ref. 37. Scatter plot of the non-bonded  $r_{\text{OH}\cdots\text{O}}$  and  $r_{\text{O}\cdots\text{O}}$  distances and  $\angle\text{HO}\cdots\text{O}$  angle ( $\theta$ ) for c) all possible pair of molecules in the ensemble, d) all EtOH-EtOH pairs, e) all EtOH-H<sub>2</sub>O pairs of molecules and f) all H<sub>2</sub>O-H<sub>2</sub>O pairs for a water-ethanol mixture with composition  $x_{\text{EtOH}} = 0.8$ .

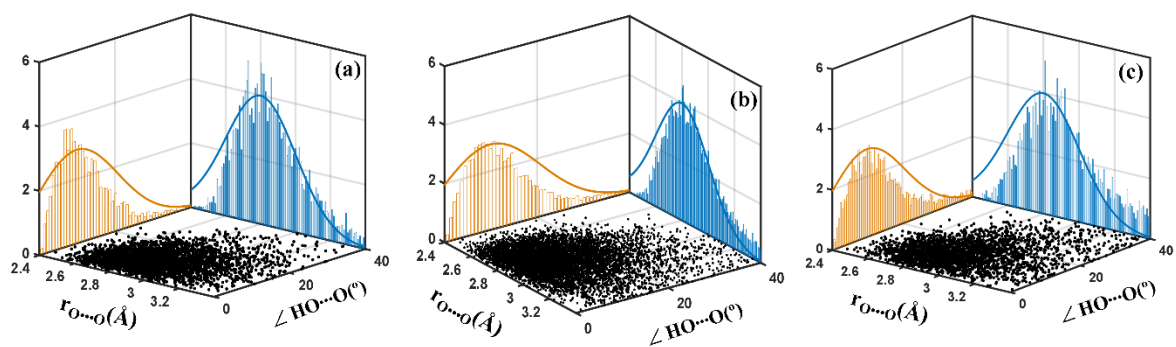

**Figure S4:** The distribution of non-bonded parameters,  $r_{O...O}$  (Å) and  $\theta^\circ$  ( $\angle HO...O$ ), from the linear region in **Fig1 (a)** for ethanol pairs **(b)** for pairs of ethanol and water **(c)** for pairs of water. The orange and blue lines are the Gaussian profiles.

**Table S2:** The geometrical cut-off and centroid values for hydrogen bonding parameters for water-ethanol mixtures at different compositions

| $x_{\text{EtOH}}$ |                                   | $r_{\text{OH}\cdots\text{O}}$<br>(Å) | $\theta^\circ$ ( $\angle\text{HO}-\text{O}$ ) | $r_{\text{O}\cdots\text{O}}$<br>(Å) | $r_{\text{OH}\cdots\text{O}}$<br>(Å) | $\theta^\circ$ ( $\angle\text{HO}-\text{O}$ ) | $r_{\text{OH}\cdots\text{O}}$<br>(Å) |
|-------------------|-----------------------------------|--------------------------------------|-----------------------------------------------|-------------------------------------|--------------------------------------|-----------------------------------------------|--------------------------------------|
|                   |                                   | Cut-off                              |                                               |                                     | Centroid                             |                                               |                                      |
| <b>0.1</b>        | EtOH:EtOH                         | 2.3                                  | 25                                            | 3.3                                 | 1.9                                  | 11.8                                          | 2.9                                  |
|                   | EtOH:H <sub>2</sub> O             | 2.3                                  | 27.9                                          | 3.3                                 | 1.8                                  | 11.7                                          | 2.8                                  |
|                   | H <sub>2</sub> O:H <sub>2</sub> O | 2.4                                  | 27.6                                          | 3.3                                 | 1.8                                  | 11.4                                          | 2.8                                  |
| <b>0.2</b>        | EtOH:EtOH                         | 2.3                                  | 24.1                                          | 3.3                                 | 1.8                                  | 9.9                                           | 2.8                                  |
|                   | EtOH:H <sub>2</sub> O             | 2.3                                  | 25.2                                          | 3.2                                 | 1.8                                  | 10.7                                          | 2.8                                  |
|                   | H <sub>2</sub> O:H <sub>2</sub> O | 2.4                                  | 27.3                                          | 3.3                                 | 1.8                                  | 11.3                                          | 2.8                                  |
| <b>0.3</b>        | EtOH:EtOH                         | 2.3                                  | 26.2                                          | 3.2                                 | 1.9                                  | 11.6                                          | 2.8                                  |
|                   | EtOH:H <sub>2</sub> O             | 2.3                                  | 26.2                                          | 3.3                                 | 1.8                                  | 11.2                                          | 2.8                                  |
|                   | H <sub>2</sub> O:H <sub>2</sub> O | 2.3                                  | 27.9                                          | 3.3                                 | 1.9                                  | 12.3                                          | 2.8                                  |
| <b>0.4</b>        | EtOH:EtOH                         | 2.3                                  | 26.5                                          | 3.3                                 | 1.8                                  | 11.7                                          | 2.8                                  |
|                   | EtOH:H <sub>2</sub> O             | 2.4                                  | 26.8                                          | 3.3                                 | 1.9                                  | 11.6                                          | 2.8                                  |
|                   | H <sub>2</sub> O:H <sub>2</sub> O | 2.3                                  | 27.6                                          | 3.3                                 | 1.9                                  | 12.1                                          | 2.8                                  |
| <b>0.5</b>        | EtOH:EtOH                         | 2.3                                  | 27.2                                          | 3.2                                 | 1.8                                  | 11.0                                          | 2.8                                  |
|                   | EtOH:H <sub>2</sub> O             | 2.3                                  | 26.6                                          | 3.3                                 | 1.8                                  | 10.9                                          | 2.8                                  |
|                   | H <sub>2</sub> O:H <sub>2</sub> O | 2.3                                  | 27.9                                          | 3.3                                 | 1.9                                  | 11.8                                          | 2.8                                  |
| <b>0.6</b>        | EtOH:EtOH                         | 2.3                                  | 26.3                                          | 3.2                                 | 1.8                                  | 10.6                                          | 2.8                                  |
|                   | EtOH:H <sub>2</sub> O             | 2.3                                  | 26.9                                          | 3.3                                 | 1.8                                  | 11.3                                          | 2.8                                  |
|                   | H <sub>2</sub> O:H <sub>2</sub> O | 2.3                                  | 26.9                                          | 3.3                                 | 1.8                                  | 11.3                                          | 2.8                                  |
| <b>0.7</b>        | EtOH:EtOH                         | 2.3                                  | 25.3                                          | 3.2                                 | 1.8                                  | 10.5                                          | 2.8                                  |
|                   | EtOH:H <sub>2</sub> O             | 2.4                                  | 27.9                                          | 3.3                                 | 1.8                                  | 11.8                                          | 2.8                                  |
|                   | H <sub>2</sub> O:H <sub>2</sub> O | 2.4                                  | 27.9                                          | 3.3                                 | 1.9                                  | 12.7                                          | 2.8                                  |
| <b>0.8</b>        | EtOH:EtOH                         | 2.4                                  | 27.7                                          | 3.3                                 | 1.8                                  | 12.0                                          | 2.8                                  |
|                   | EtOH:H <sub>2</sub> O             | 2.4                                  | 26.8                                          | 3.3                                 | 1.8                                  | 12.1                                          | 2.8                                  |
|                   | H <sub>2</sub> O:H <sub>2</sub> O | 2.3                                  | 27.9                                          | 3.3                                 | 1.9                                  | 12.6                                          | 2.8                                  |
| <b>0.9</b>        | EtOH:EtOH                         | 2.4                                  | 27.3                                          | 3.3                                 | 1.8                                  | 11.1                                          | 2.8                                  |
|                   | EtOH:H <sub>2</sub> O             | 2.3                                  | 26.6                                          | 3.2                                 | 1.9                                  | 12.1                                          | 2.8                                  |
|                   | H <sub>2</sub> O:H <sub>2</sub> O | 2.3                                  | 27.9                                          | 3.2                                 | 1.8                                  | 12.2                                          | 2.8                                  |
| <b>1</b>          |                                   | 2.3                                  | 27.4                                          | 3.3                                 | 1.9                                  | 11.4                                          | 2.8                                  |

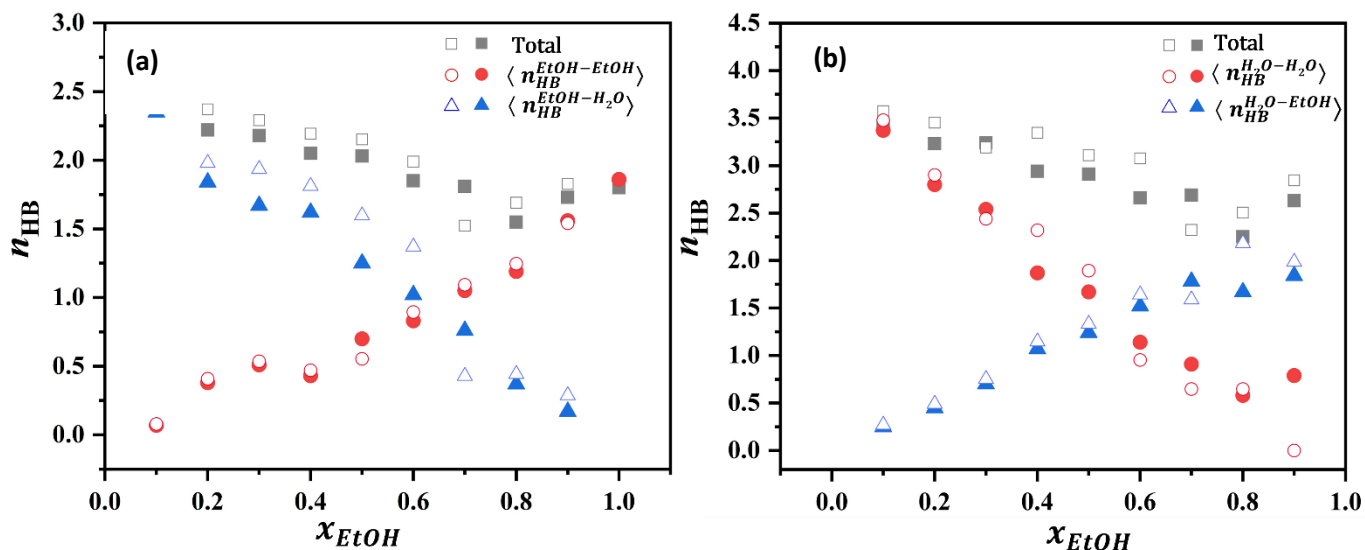

**Figure S5.** Average number of hydrogen bonds per molecule  $\langle n_{HB} \rangle$  in the water-ethanol mixture at different compositions a) the average number of water,  $\langle n_{HB}^{EtOH-H_2O} \rangle$  and ethanol,  $\langle n_{HB}^{EtOH-EtOH} \rangle$ , molecules that are H-bonded to an ethanol molecule as a function of  $x_{EtOH}$ , and b) the average number of water,  $\langle n_{HB}^{H_2O-H_2O} \rangle$ , and ethanol,  $\langle n_{HB}^{H_2O-EtOH} \rangle$  molecules that are H-bonded to a water molecule as a function of  $x_{EtOH}$ . The filled data points were estimated using the cut-off parameters of Table S2 while the open data points using the empirical geometrical cut-off values,  $r_{O-O} < 3.5 \text{ \AA}$  and angle  $\angle HO \cdots O < 30^\circ$  from Reference 27.



**Table S3:** Average number of hydrogen bonds per molecule  $\langle n_{HB} \rangle$  in the water-ethanol mixture at different compositions estimated using the cut-off parameters of Table S2. The values in parenthesis have been estimated using the empirical geometrical cut-off values,  $r_{O-O} < 3.5 \text{ \AA}$  and angle  $\angle \text{HO} \cdots \text{O} < 30^\circ$  from Reference 27,

| $x_{EtOH}$ | Ethanol, $\langle n_{HB} \rangle$ |                                      |                                      | Water, $\langle n_{HB} \rangle$ |                                      |                                      |
|------------|-----------------------------------|--------------------------------------|--------------------------------------|---------------------------------|--------------------------------------|--------------------------------------|
|            | Total                             | $\langle n_{HB}^{EtOH-EtOH} \rangle$ | $\langle n_{HB}^{EtOH-H_2O} \rangle$ | Total                           | $\langle n_{HB}^{H_2O-EtOH} \rangle$ | $\langle n_{HB}^{H_2O-H_2O} \rangle$ |
| <b>0.1</b> | 2.42 (2.53)                       | 0.07 (0.08)                          | 2.35 (2.45)                          | 3.42 (3.57)                     | 3.37 (3.48)                          | 0.25 (0.27)                          |
| <b>0.2</b> | 2.22 (2.37)                       | 0.38 (0.41)                          | 1.84 (1.98)                          | 3.23 (3.45)                     | 2.8 (2.90)                           | 0.45 (0.49)                          |
| <b>0.3</b> | 2.18 (2.29)                       | 0.51 (0.53)                          | 1.67 (1.94)                          | 3.24 (3.19)                     | 2.54 (2.44)                          | 0.7 (0.75)                           |
| <b>0.4</b> | 2.05 (2.19)                       | 0.43 (0.47)                          | 1.62 (1.81)                          | 2.94 (3.35)                     | 1.87 (2.31)                          | 1.07 (1.15)                          |
| <b>0.5</b> | 2.03 (2.15)                       | 0.7 (0.55)                           | 1.25 (1.60)                          | 2.91 (3.11)                     | 1.67 (1.90)                          | 1.24 (1.33)                          |
| <b>0.6</b> | 1.85 (1.99)                       | 0.83 (0.89)                          | 1.02 (1.37)                          | 2.66 (3.08)                     | 1.14 (0.95)                          | 1.52 (1.64)                          |
| <b>0.7</b> | 1.81 (1.52)                       | 1.05 (1.09)                          | 0.76 (0.43)                          | 2.69 (2.32)                     | 0.91 (0.65)                          | 1.78 (1.58)                          |
| <b>0.8</b> | 1.55 (1.69)                       | 1.19 (1.25)                          | 0.37 (0.44)                          | 2.25 (2.50)                     | 0.58 (0.65)                          | 1.67 (2.19)                          |
| <b>0.9</b> | 1.73 (1.83)                       | 1.56 (1.54)                          | 0.17 (0.29)                          | 2.63 (2.84)                     | 0.79 (0)                             | 1.84 (1.99)                          |
| <b>1</b>   | 1.8 (1.85)                        |                                      |                                      |                                 |                                      |                                      |
